# Supplementary material
Source: bioRxiv or medRxiv preprint supplement (https://www.biorxiv.org/highwire/filestream/89717/field_highwire_adjunct_files/1/289249-2.pdf)
Supplement: Supplementary file [file 289249-2.pdf]

## Data Sheet 2

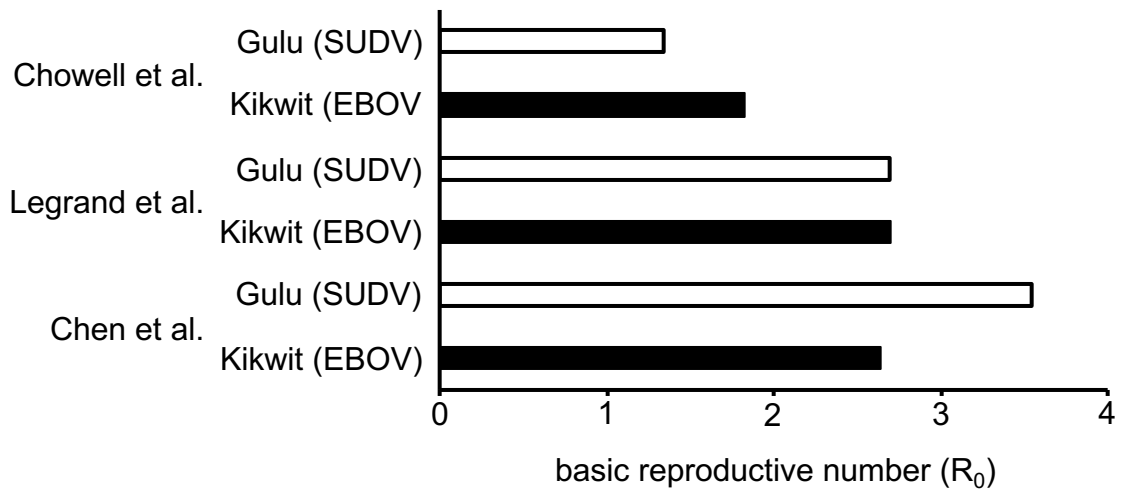

**Data Sheet 2.** Basic reproductive numbers ( $R_0$ ) determined for the Ebola virus outbreak in Kikwit (DR Congo, 1995) and the Sudan virus outbreak in Gulu (Uganda, 2000/ 2001) as determined in three different studies (15-17).
